# Supplementary material for: Influence of Supercritical Carbon Dioxide on the Activity and Conformational Changes of α-Amylase, Lipase, and Peroxidase in the Solid State Using White Wheat Flour as an Example
Source: MDPI journal article supplement (doi:10.3390/foods12244499), 2023-12-16
Supplement: s1 [file s1]

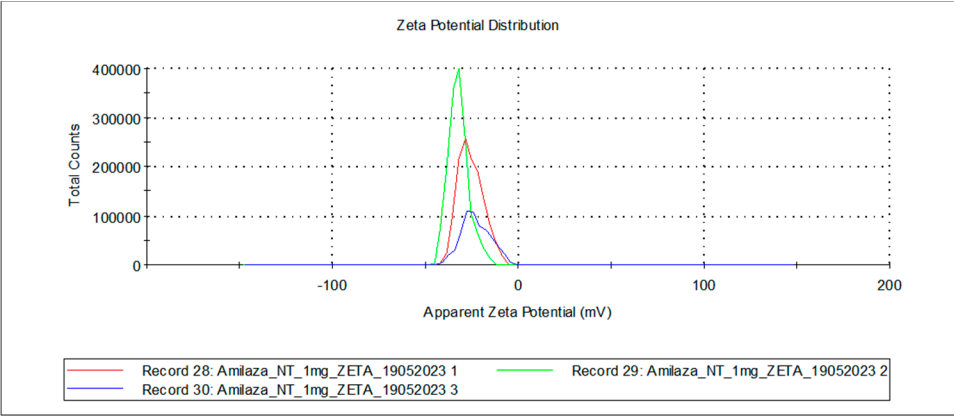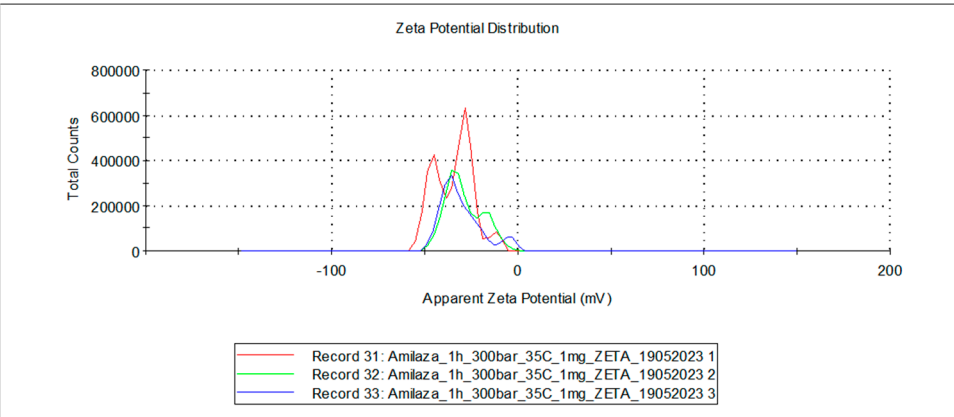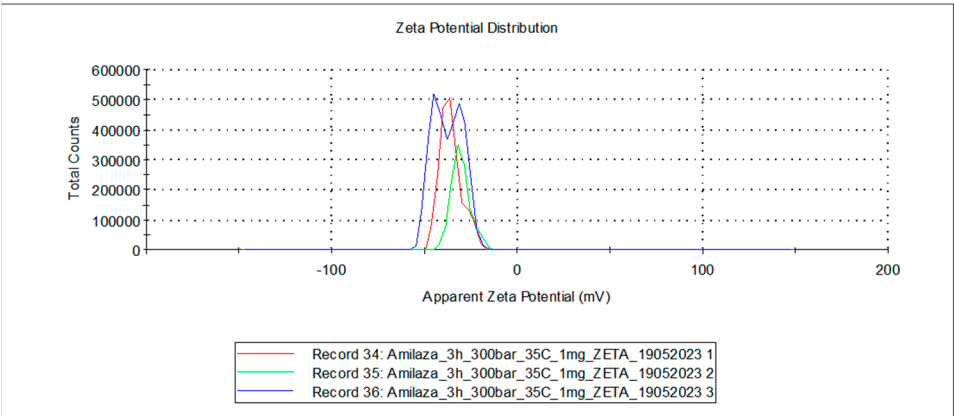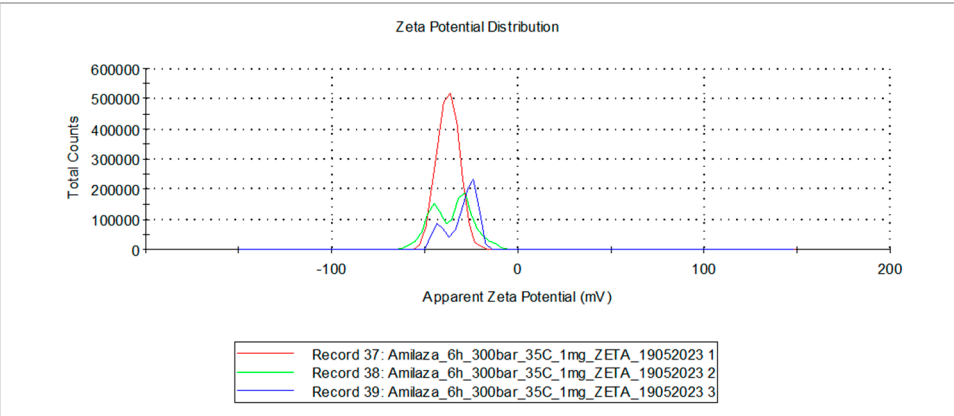

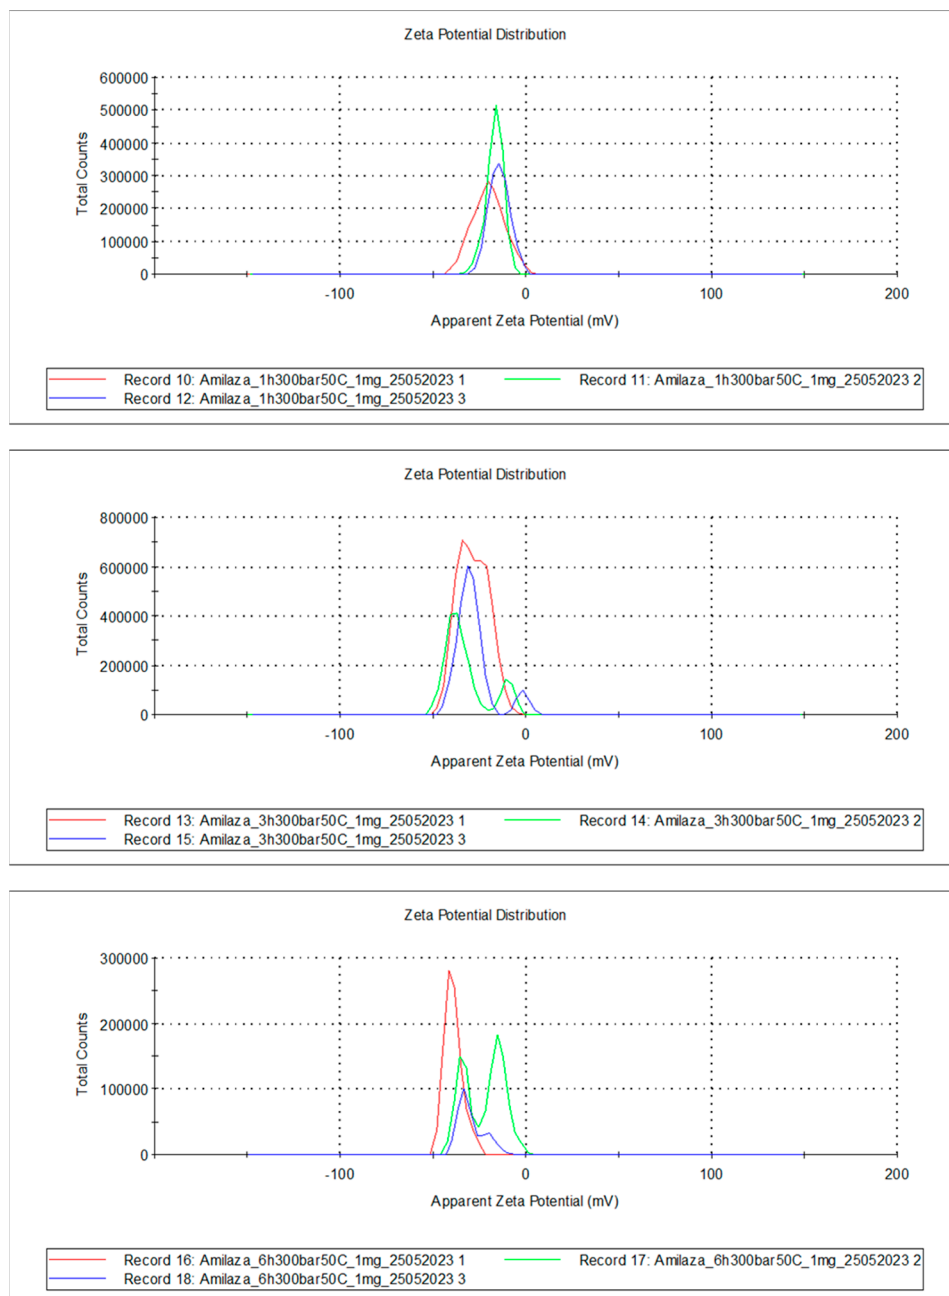

**Figure S1.**  $\zeta$ -potential determination of  $\alpha$ -amylase before and after 1h, 3h and 6h sc-CO<sub>2</sub> treatment at two different temperatures (35°C and 50°C).

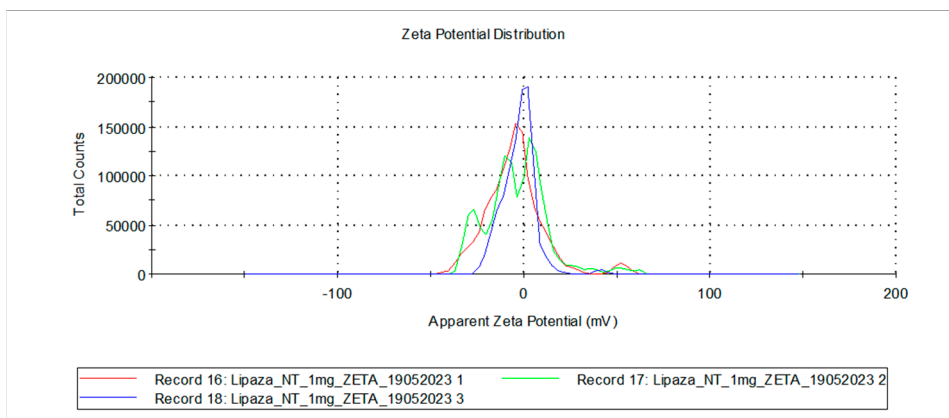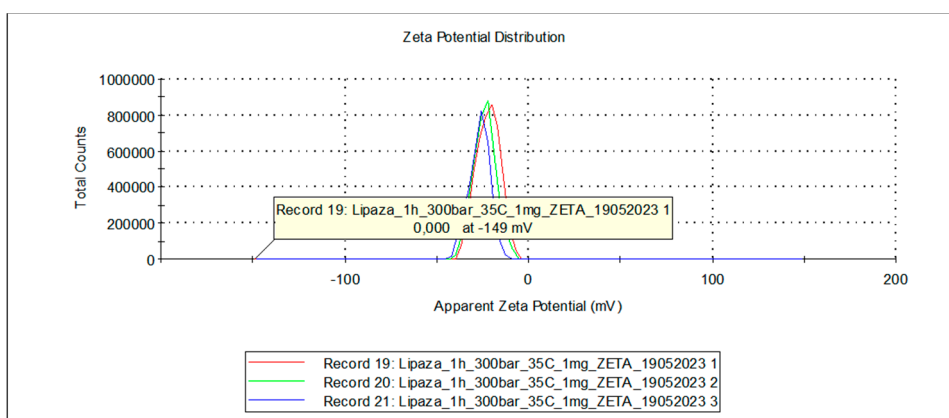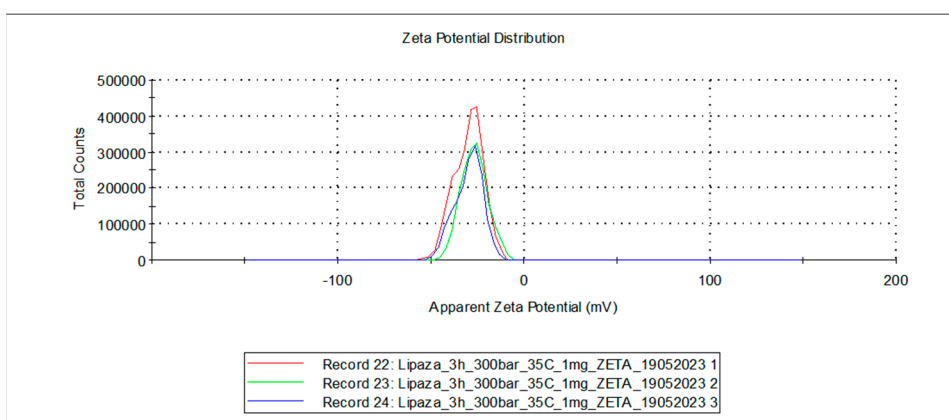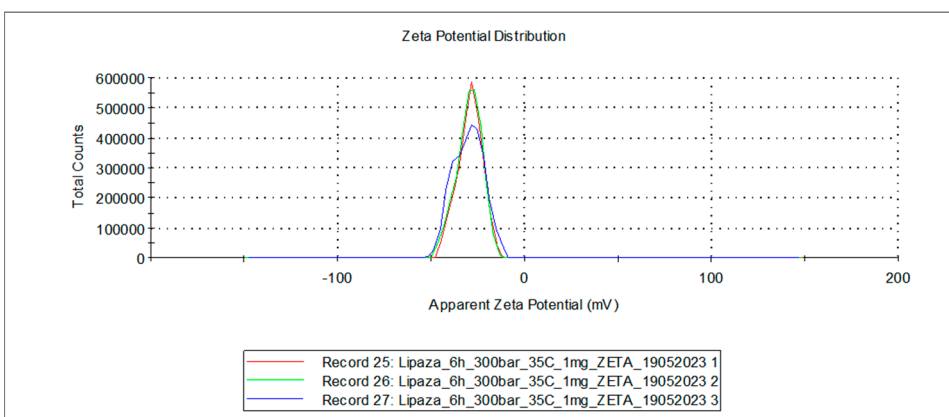

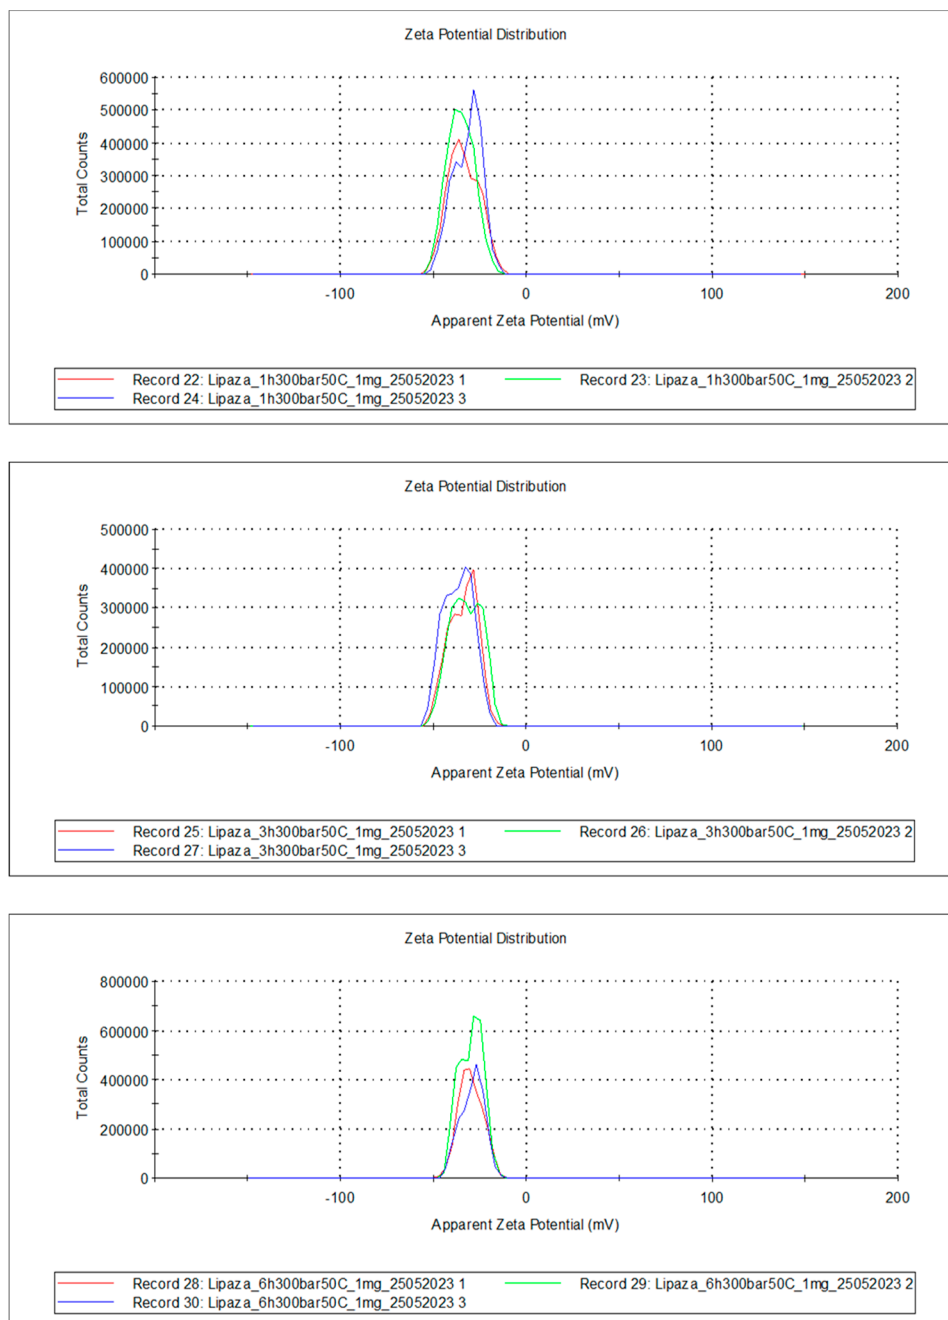

**Figure S2.**  $\zeta$ -potential determination of lipase before and after 1h, 3h and 6h sc-CO<sub>2</sub> treatment at two different temperatures (35°C and 50°C).

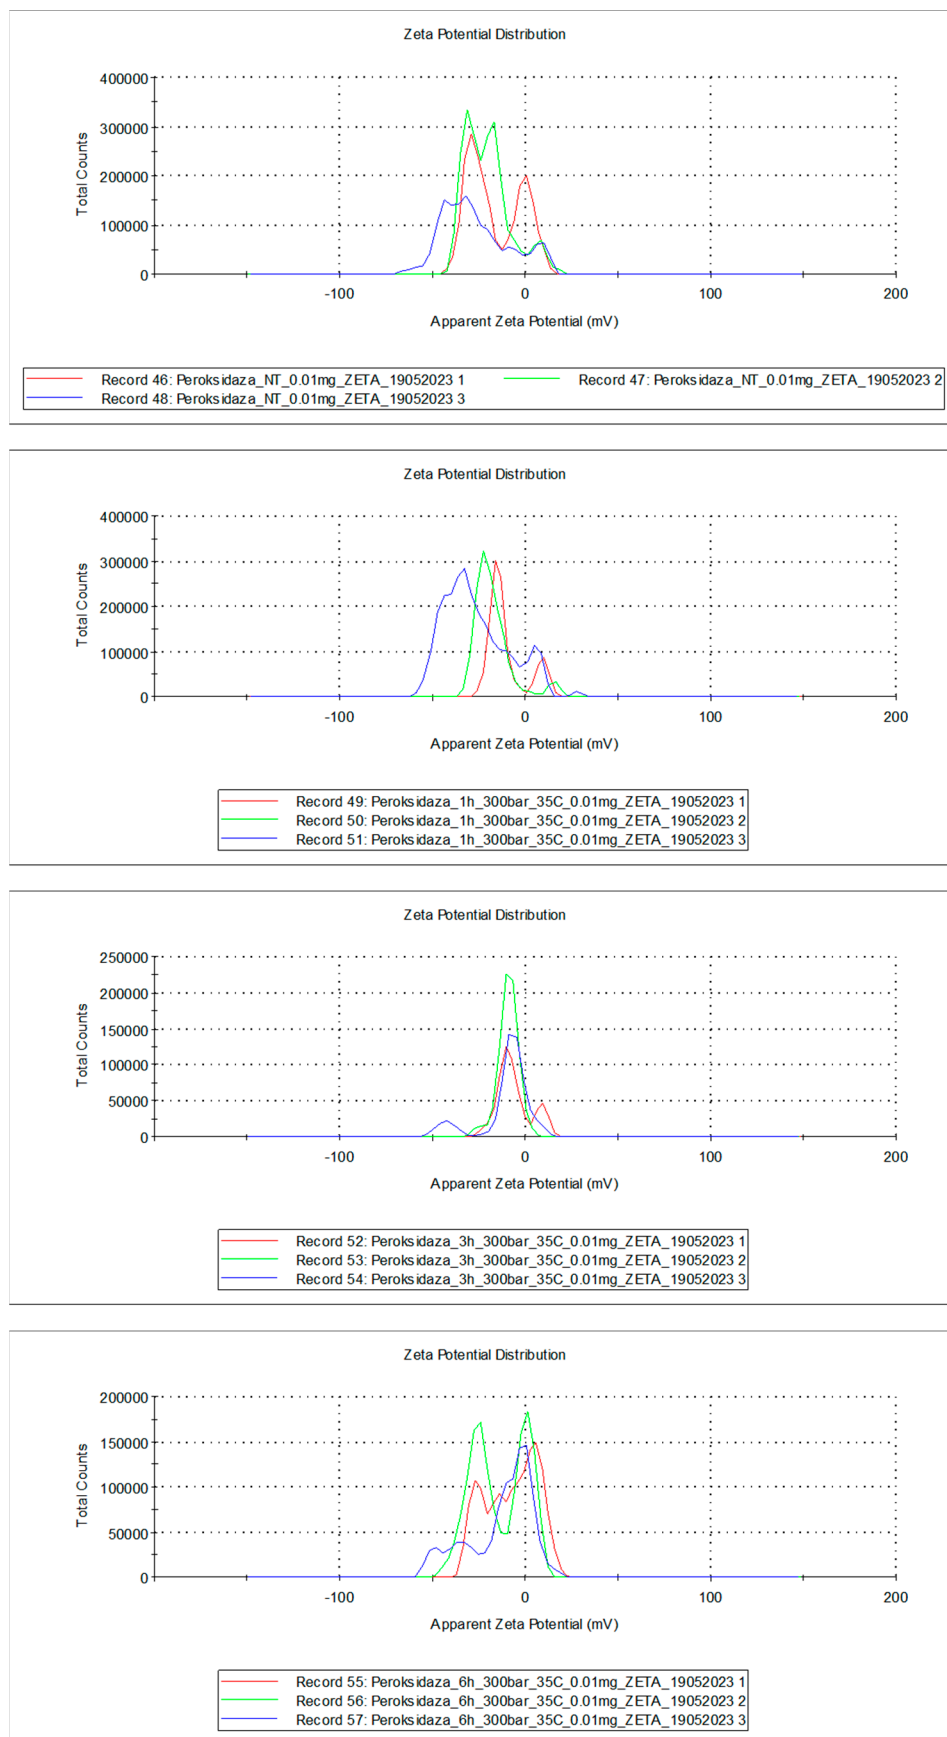

**Figure S3.**  $\zeta$ -potential determination of POD before and after 1h, 3h and 6h sc-CO<sub>2</sub> treatment at a temperature of 35°C.
